# Supplementary material for: Leveraging complex network features improves vaccine stance classification
Source: Springer Nature journal article supplement (doi:10.1038/s41598-025-27487-8), 2025-12-08
Supplement: MOESM1 [file 41598_2025_27487_MOESM1_ESM.pdf]

## Supplementary Information

# Leveraging complex network features improves vaccine stance classification

## Supplementary Figures

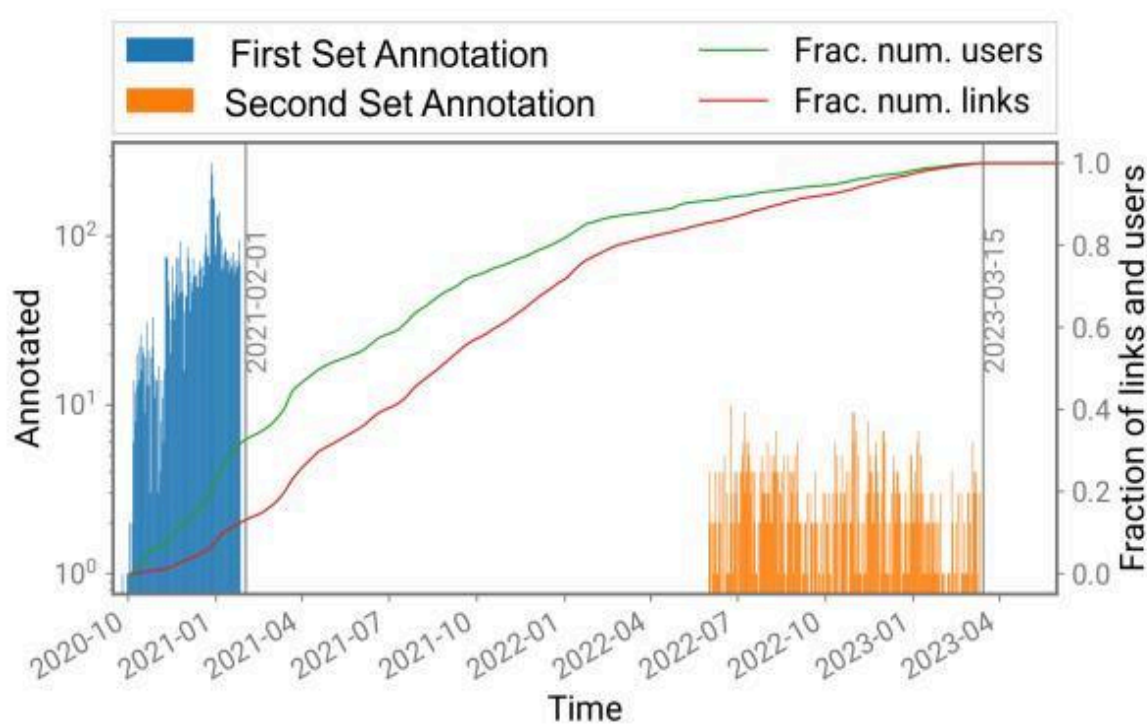

**Supplementary Figure S1.** Distribution over time of annotated tweets and retweet network evolution. Vertical bars show the number of weekly tweets that were randomly sampled for manual annotation. Blue bars represent the first dataset and orange bars the second dataset. The lines represent the fraction of (green) users and (red) links being part of the retweet network increasing cumulatively over time.

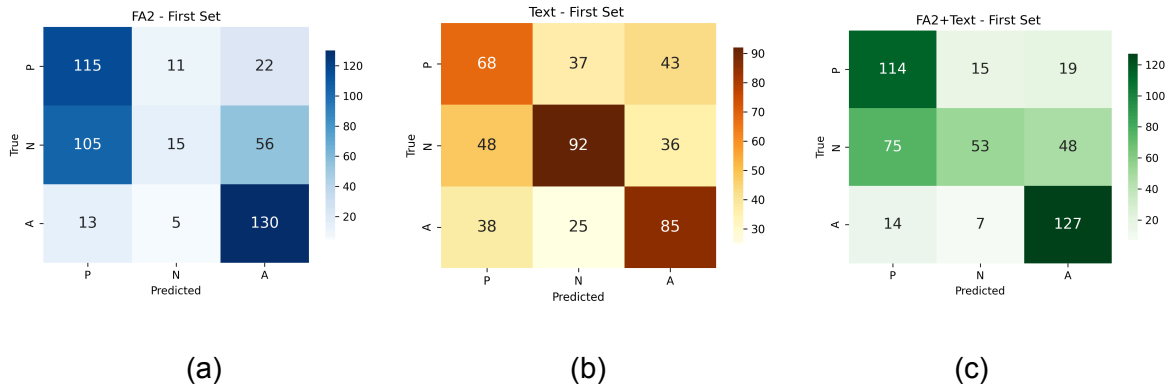

**Supplementary Figure S2.** Confusion Matrices for the test set of the first dataset for a) fa2-based classifier, b) text-based classifier and c) fa2+text classifier. P: ProVax, N: Neutral, A: AntiVax.

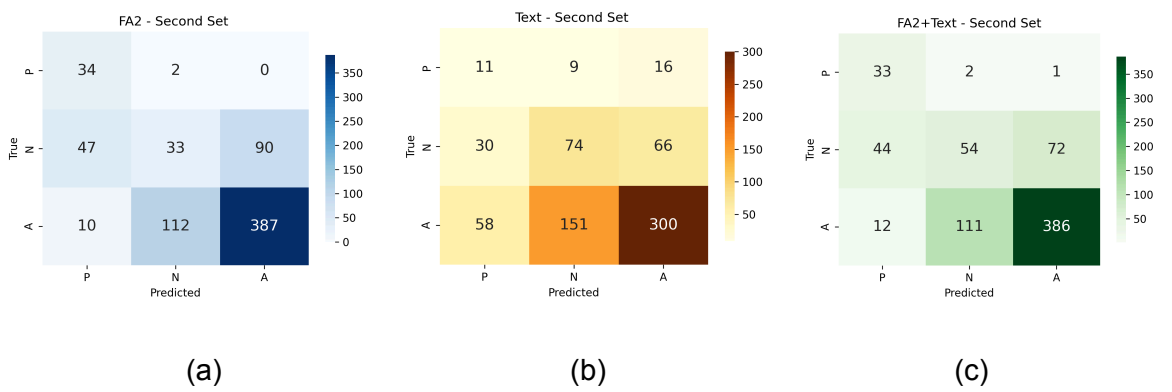

**Supplementary Figure S3.** Confusion Matrices for the second dataset for a) fa2-based classifier, b) text-based classifier and c) fa2+text classifier. P: ProVax, N: Neutral, A: AntiVax.
